# Supplementary material for: Measurement report: 30 years of BTEX monitoring at a suburban site in Switzerland supported by additional urban VOC observations
Source: Copernicus journal article supplement (doi:10.5194/acp-26-869-2026), 2026-01-20
Supplement: Supplementary file 1 [file acp-26-869-2026-supplement.pdf]

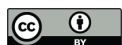

*Supplement of*

## **Measurement report: 30 years of BTEX monitoring at a suburban site in Switzerland supported by additional urban VOC observations**

**Zoé Le Bras et al.**

*Correspondence to:* Stefan Reimann ([stefan.reimann@empa.ch](mailto:stefan.reimann@empa.ch))

The copyright of individual parts of the supplement might differ from the article licence.

## List of Figures

|     |                                                                                                                                    |    |
|-----|------------------------------------------------------------------------------------------------------------------------------------|----|
| S1  | Coverage of BTEX observations in DUE from 1994 to 2024 . . . . .                                                                   | 3  |
| S2  | Yearly relative average contribution of each BTEX compound to total<br>BTEX concentration from 1994 to 2010 at Dübendorf . . . . . | 3  |
| S3  | Comparison between estimated and measured concentrations for ethylben-<br>zene and xylene between 1994 and 2010 . . . . .          | 4  |
| S4  | NO <sub>x</sub> and CO yearly trends in DUE and ZUE . . . . .                                                                      | 4  |
| S5  | Toluene time series from 2000 to 2016 in DUE and ZUE . . . . .                                                                     | 5  |
| S6  | Ethylbenzene time series from 2000 to 2016 in DUE and ZUE . . . . .                                                                | 5  |
| S7  | m,p-xylene time series from 2000 to 2016 in DUE and ZUE . . . . .                                                                  | 6  |
| S8  | Yearly BTEX average concentrations at the different Swiss monitoring sta-<br>tions . . . . .                                       | 6  |
| S9  | Relative monthly variations of BTEX concentrations . . . . .                                                                       | 7  |
| S10 | Benzene time series from 2000 to 2016 in DUE and ZUE . . . . .                                                                     | 8  |
| S11 | T : B ratio vs CO concentrations in DUE . . . . .                                                                                  | 8  |
| S12 | Monthly average X : E ratio in DUE and ZUE . . . . .                                                                               | 9  |
| S13 | Summer and winter T : CO ratios between 1994 and > 2020 in DUE . . .                                                               | 10 |
| S14 | Yearly average OVOC concentrations and OFP for OVOCs in ZUE . . . .                                                                | 11 |

## List of Tables

|    |                                                    |   |
|----|----------------------------------------------------|---|
| S1 | VOCs monitored in Zurich with the GC-FID . . . . . | 2 |
|----|----------------------------------------------------|---|

**Table S1.** VOCs measured at the Zurich site with the GC-FID in 2005, 2015, 2023 and 2024

| Compound        | VOC class  |
|-----------------|------------|
| ethanol         | oxygenated |
| methanol        |            |
| propanone       |            |
| ethanal         |            |
| propanols       |            |
| ethylacetate    |            |
| butanone        |            |
| acetonitrile    |            |
| MTBE            |            |
| ethane          | alkane     |
| propane         |            |
| n-butane        |            |
| 2-methylbutane  |            |
| 2-methylpropane |            |
| isohexanes      |            |
| n-pentane       |            |
| isoheptanes     |            |
| n-hexane        |            |
| ethene          | alkene     |
| propene         |            |
| butenes         |            |
| pentenes        |            |
| isoprene        |            |
| 1-3-butadiene   |            |
| ethyne          | alkyne     |
| benzene         | aromatic   |
| toluene         |            |
| ethylbenzene    |            |
| m-p-xylene      |            |
| o-xylene        |            |
| limonene        | terpene    |
| a-pinene        |            |

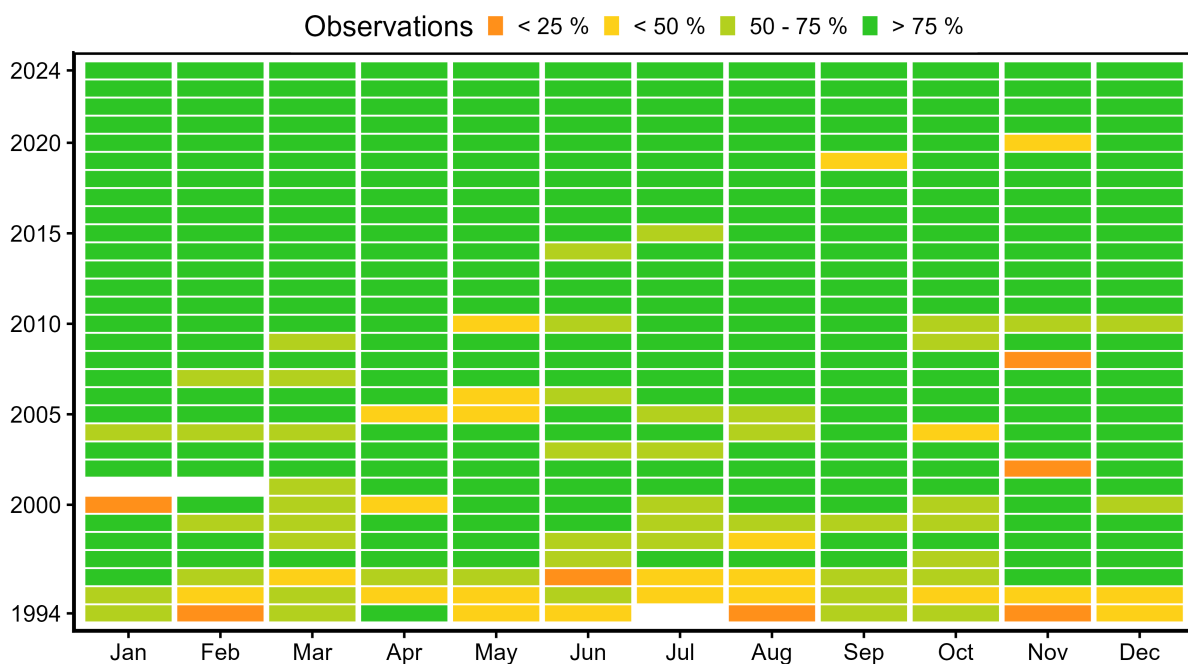

**Figure S1.** Monthly coverage of BTEX observations in DUE with the 1-h resolution aggregated dataset from 1994 to 2024. A monthly data coverage of 100 % represents at least 648 observations taking into account routine instrument maintenance and calibrations. Missing data are represented by a white square.

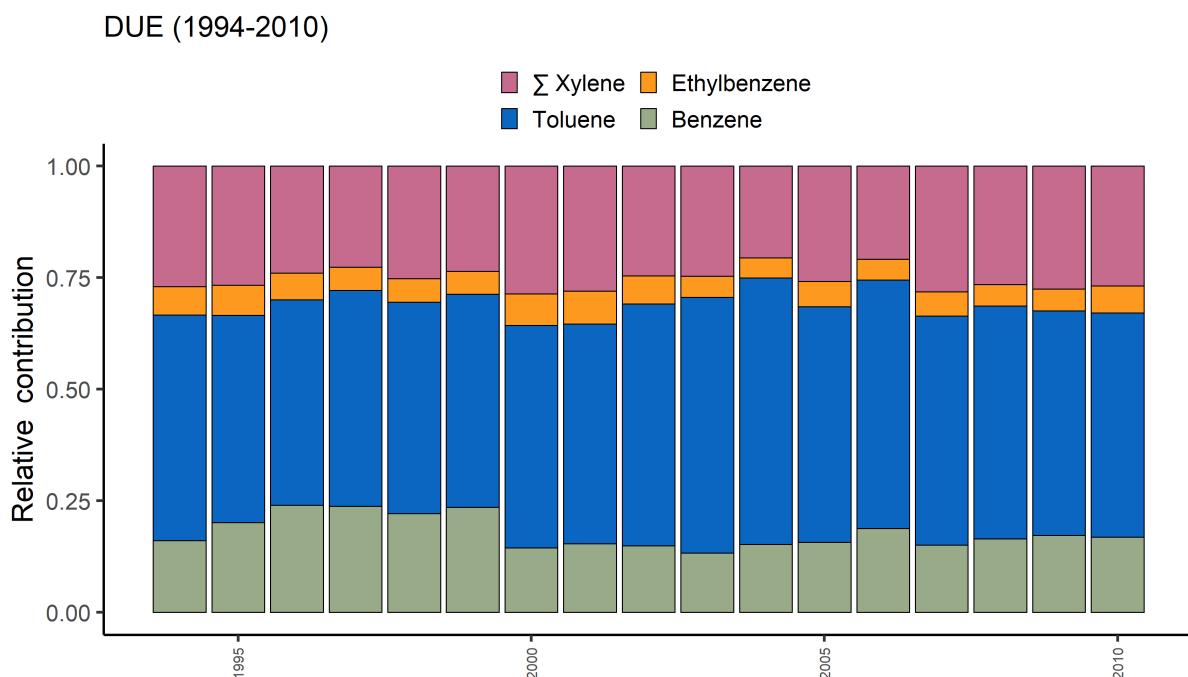

**Figure S2.** Yearly relative average contribution of each BTEX compound to the yearly average total BTEX concentrations from 1994 to 2010 at DUE. On average, benzene and toluene contributed  $66.2 \pm 3.2\%$ , xylene  $28.1 \pm 2.8\%$  and ethylbenzene  $5.7 \pm 0.4\%$  to the total BTEX concentration.

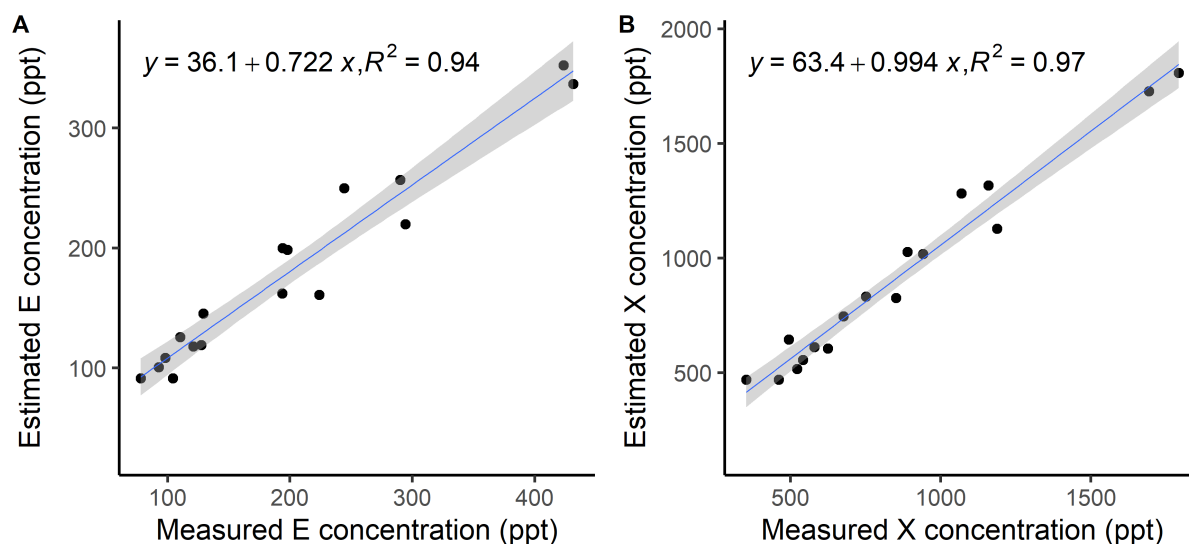

**Figure S3.** Yearly average comparison between estimated concentration from the relative contribution to total BTEX and measured concentration for ethylbenzene (A) and xylene (B) at DUE between 1994 and 2010.

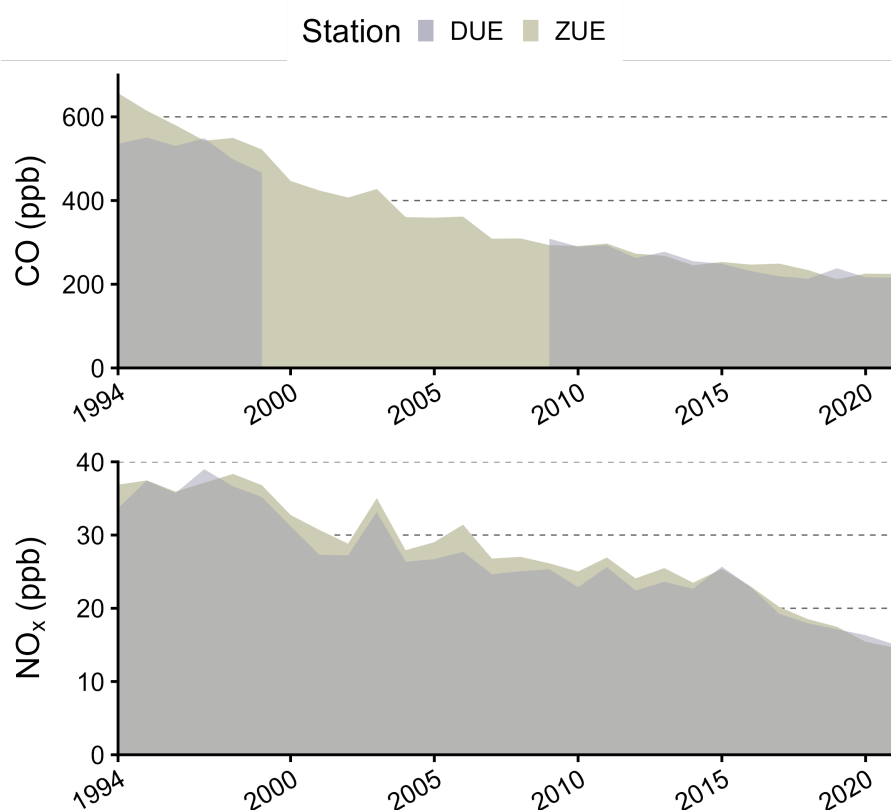

**Figure S4.** Yearly average concentrations of CO and NO<sub>x</sub> in DUE (gray) and in ZUE (green) from 1994 to 2023.

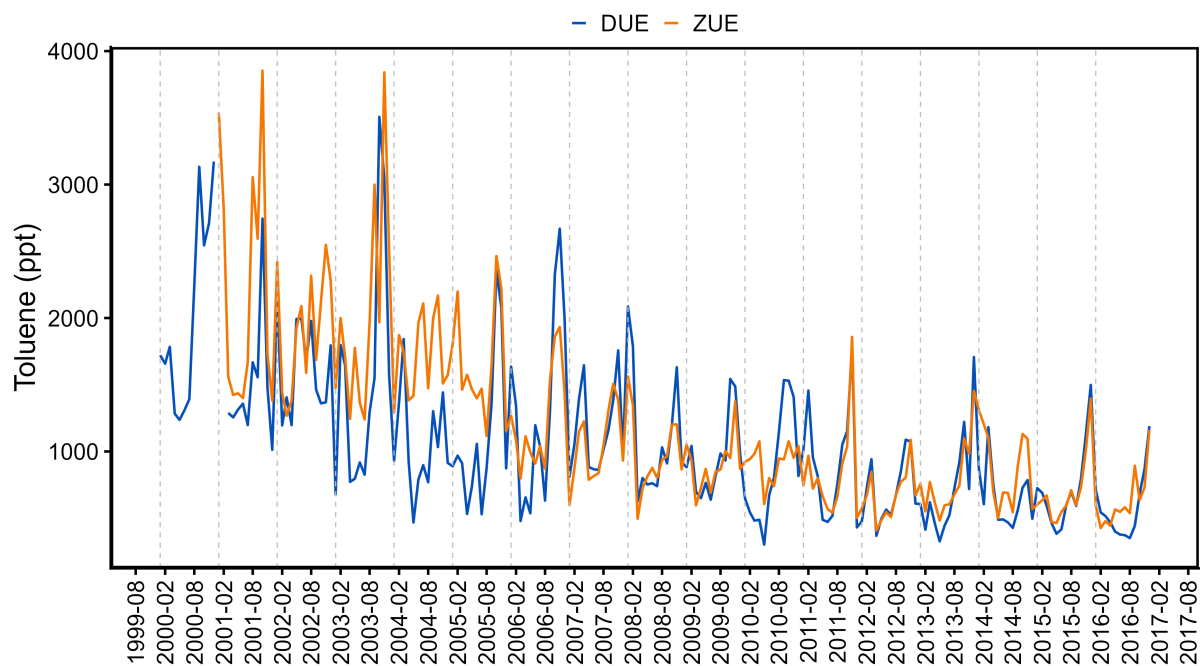

**Figure S5.** Monthly average toluene concentration in DUE (blue) and in ZUE (orange) from 2000 to 2016.

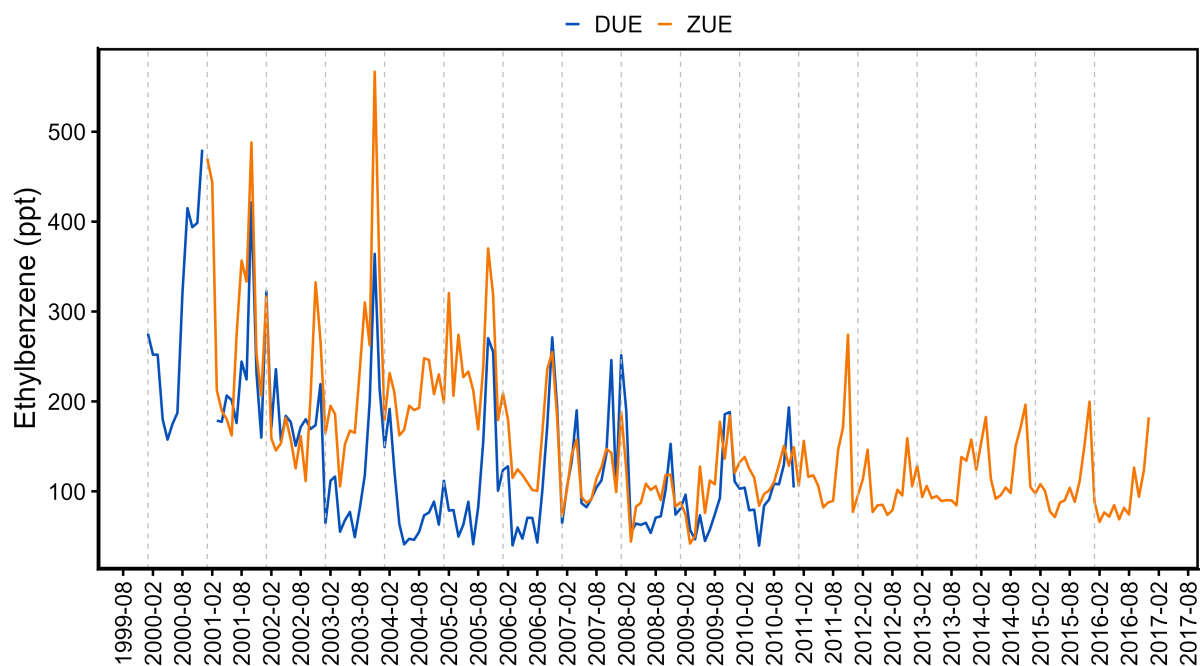

**Figure S6.** Monthly average ethylbenzene concentration in DUE (blue) and in ZUE (orange) from 2000 to 2016.

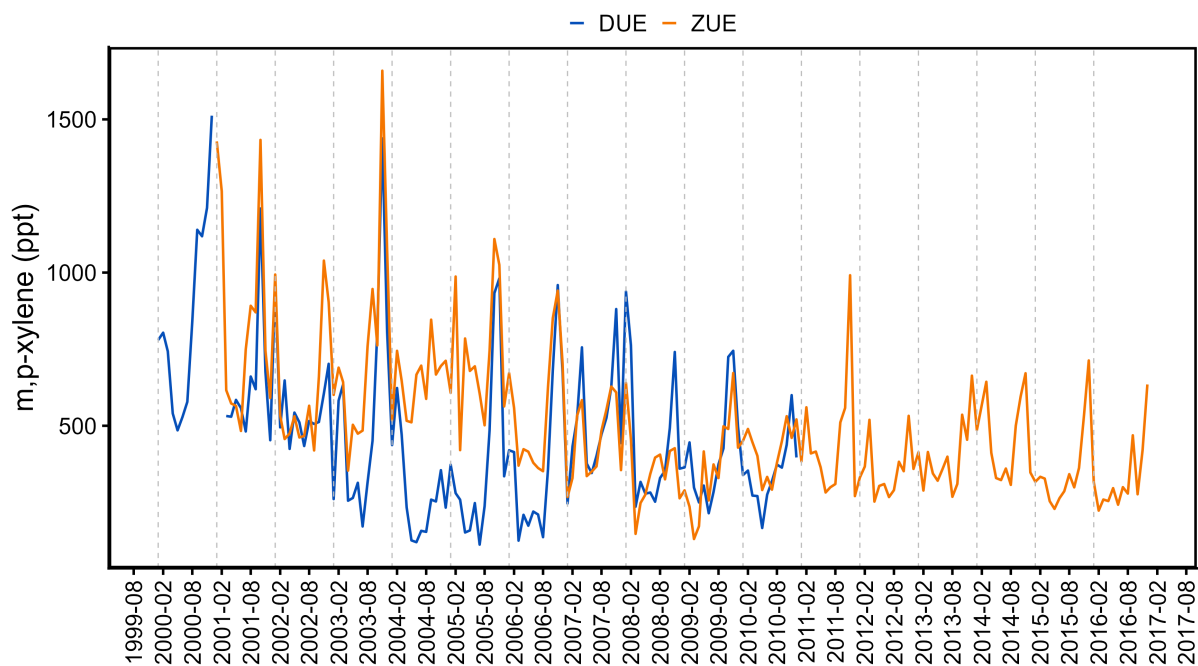

**Figure S7.** Monthly average m,p-xylene concentration in DUE (blue) and in ZUE (orange) from 2000 to 2016.

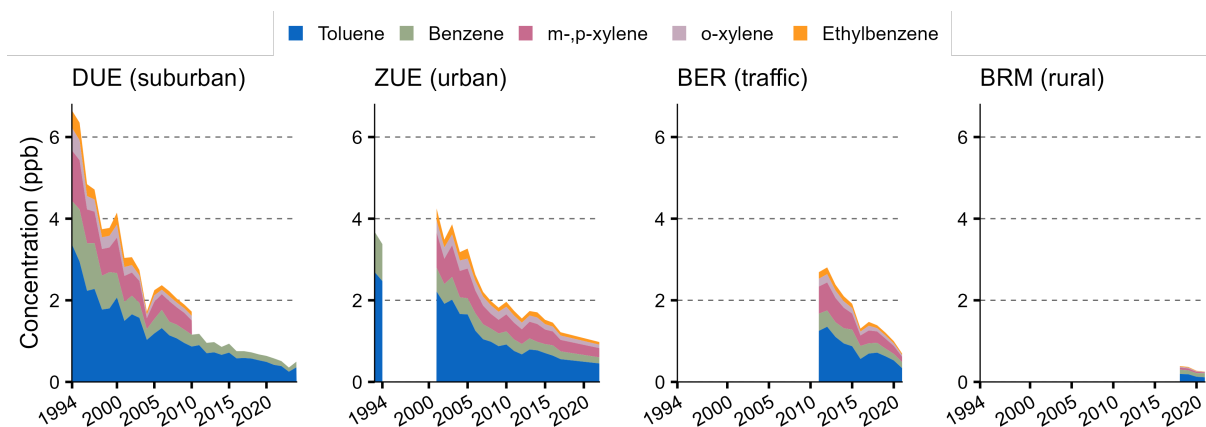

**Figure S8.** Yearly BTEX average concentrations at Dübendorf (DUE, suburban), Zurich Kaserne (ZUE, urban), Bern (BER, traffic) and Beromünster (BRM, rural) stations.

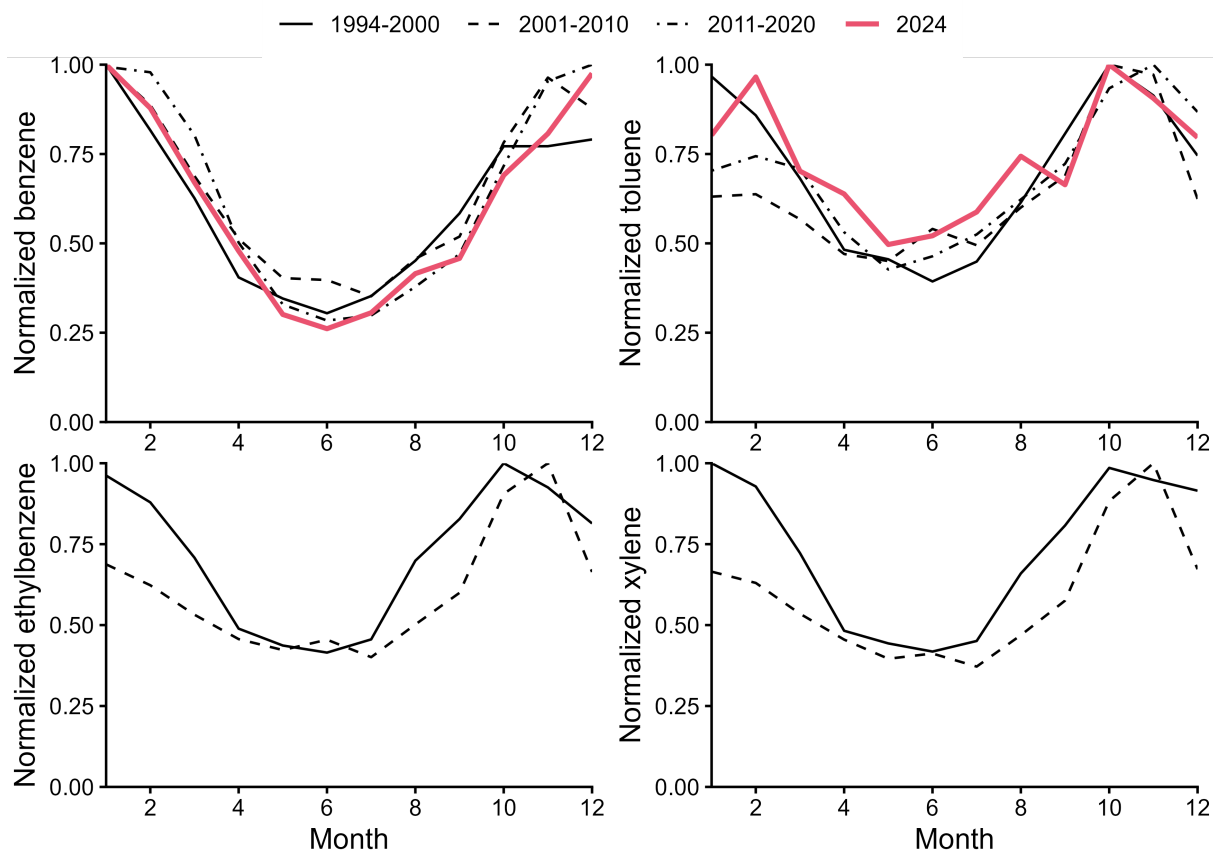

**Figure S9.** Relative monthly variations of benzene, toluene, ethylbenzene, and xylene (sum of m-, o- and p-xylene) concentrations at the suburban station DUE. Monthly average concentrations were normalized by the maximum monthly average calculated for each respective period.



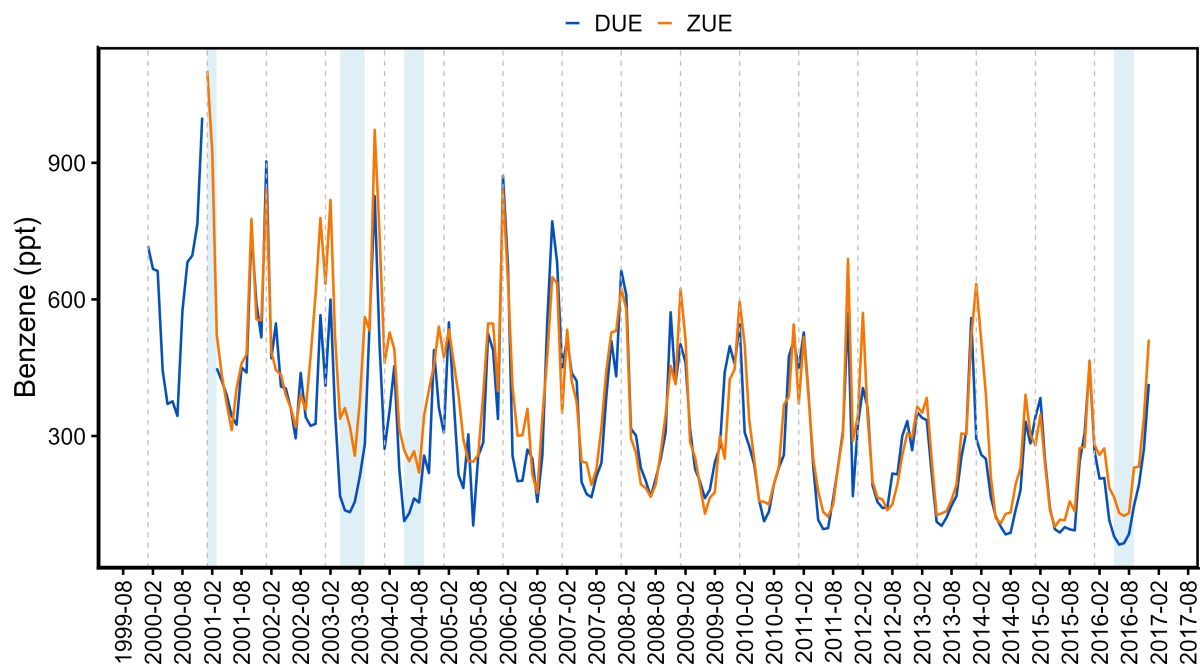

**Figure S10.** Monthly average benzene concentration in DUE (blue) and in ZUE (orange) from 2000 to 2016. The vertical gray bars represent the differences observed between both stations as shown in Fig. 3. in 2003, 2004 and 2016.

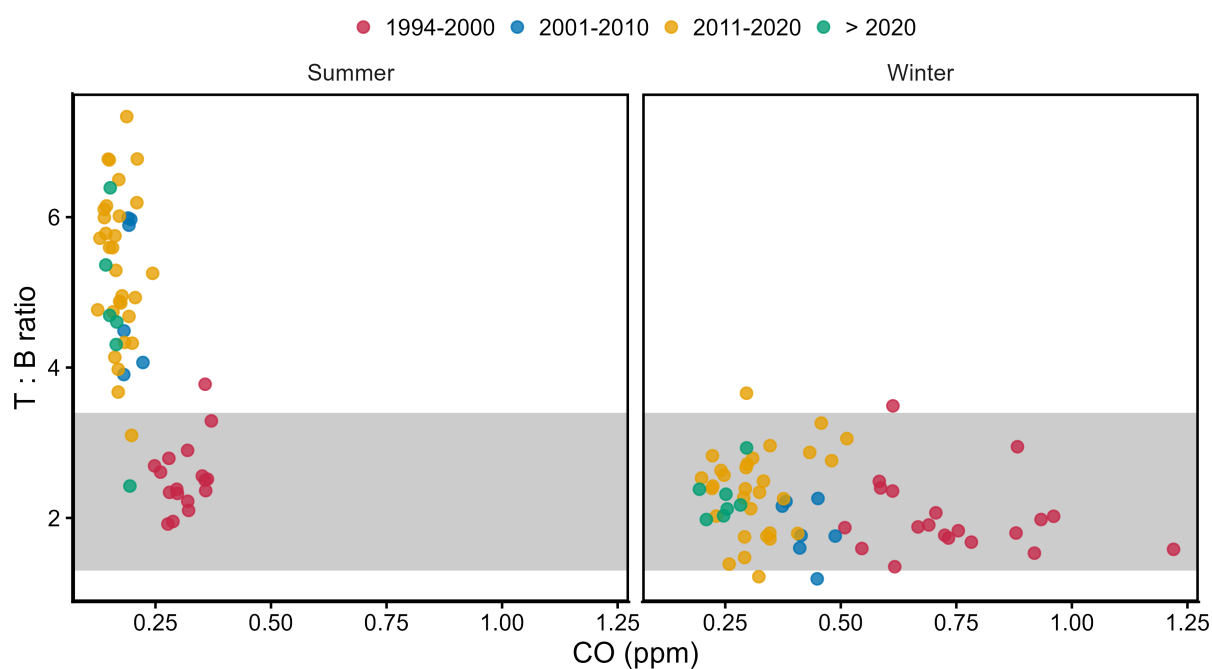

**Figure S11.** Monthly averages for T:B ratio and their corresponding CO concentrations in DUE grouped by time periods (1994–2000, 2001–2010, 2011–2020, > 2000) in summer (left) and in winter (right). The gray area marks the T:B range for typical vehicle emissions (1.3 - 3.4).

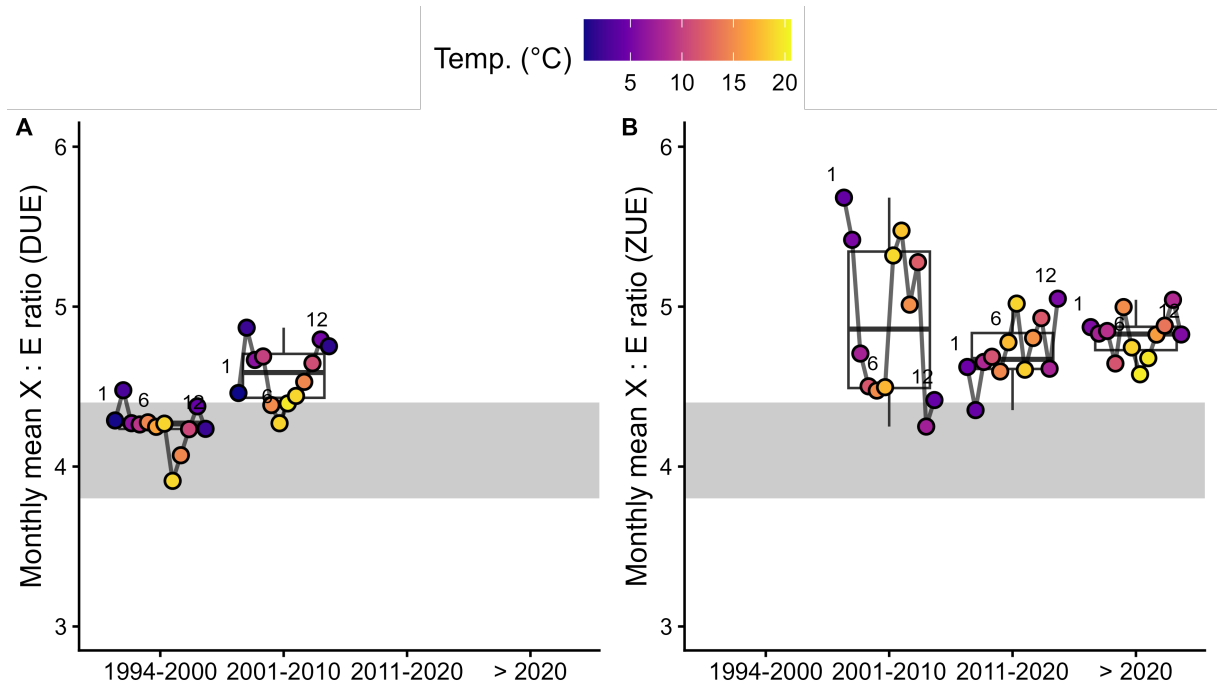

**Figure S12.** Monthly average X:E ratio in DUE (A) and ZUE (B) grouped by time periods (1994–2000, 2001–2010, 2011–2020, > 2000). Each dot represents the average X : E ratio for a given month, color-coded by the corresponding mean temperature (°C). The gray area marks the X:E range for fresh gasoline emissions (3.8 - 4.4). Labels for January (1), June (6), and December (12) are indicated.

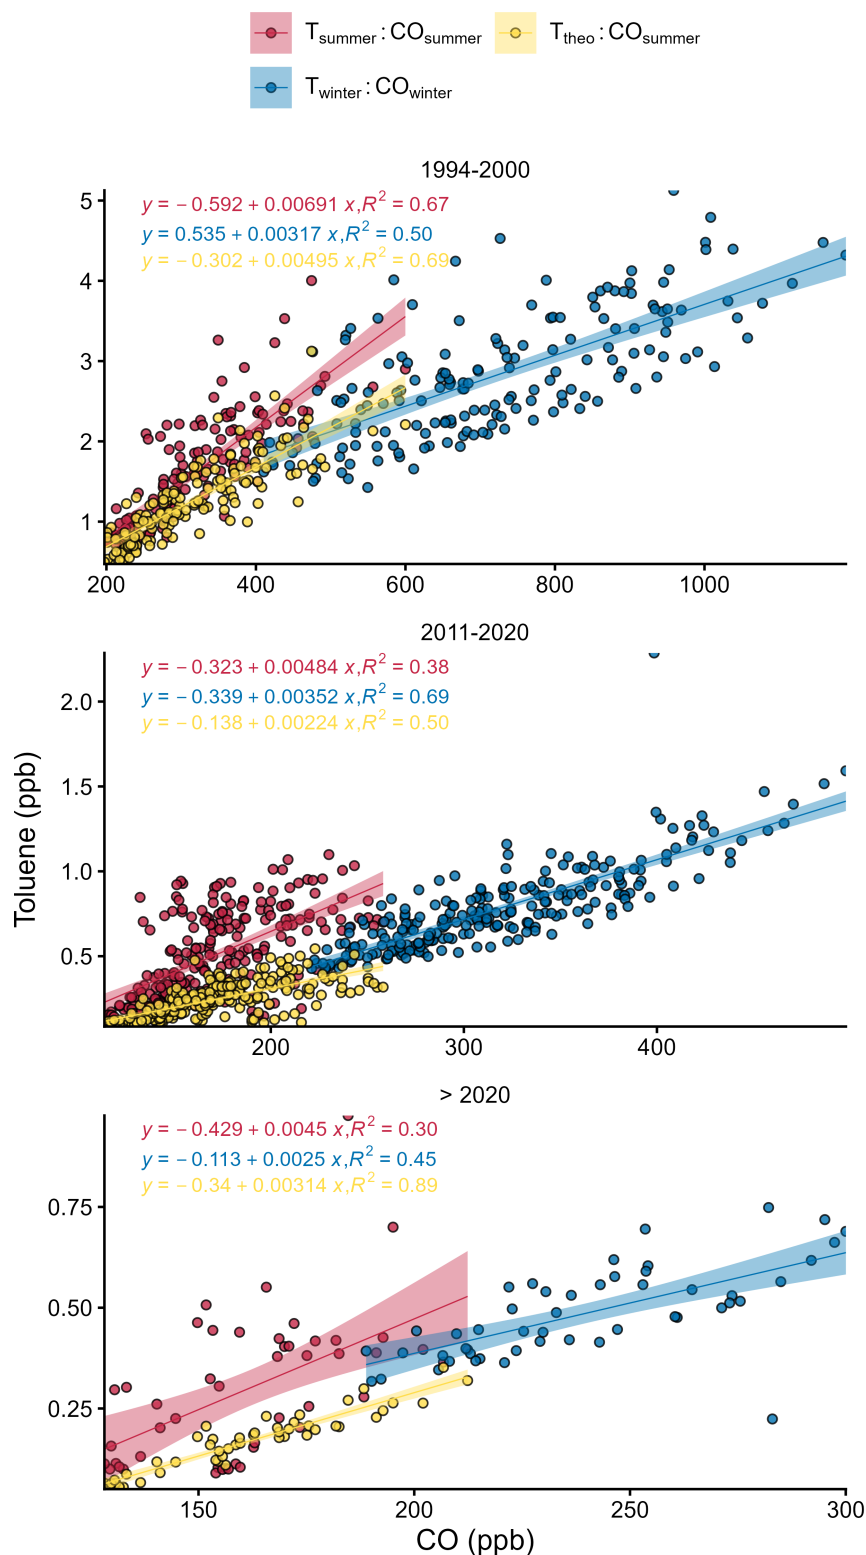

**Figure S13.** Summer (red) and winter (blue) toluene : CO concentrations together with theoretical summer toluene : CO concentrations (yellow) grouped by time periods (1994–2000, 2011–2020, > 2000). Each dot represents the hourly concentration for a given year. Linear regressions with their associated 95 % confidence intervals, equations and  $R^2$  are indicated in each panel. No data are shown for the period 2000–2010 due to the absence of CO observations.

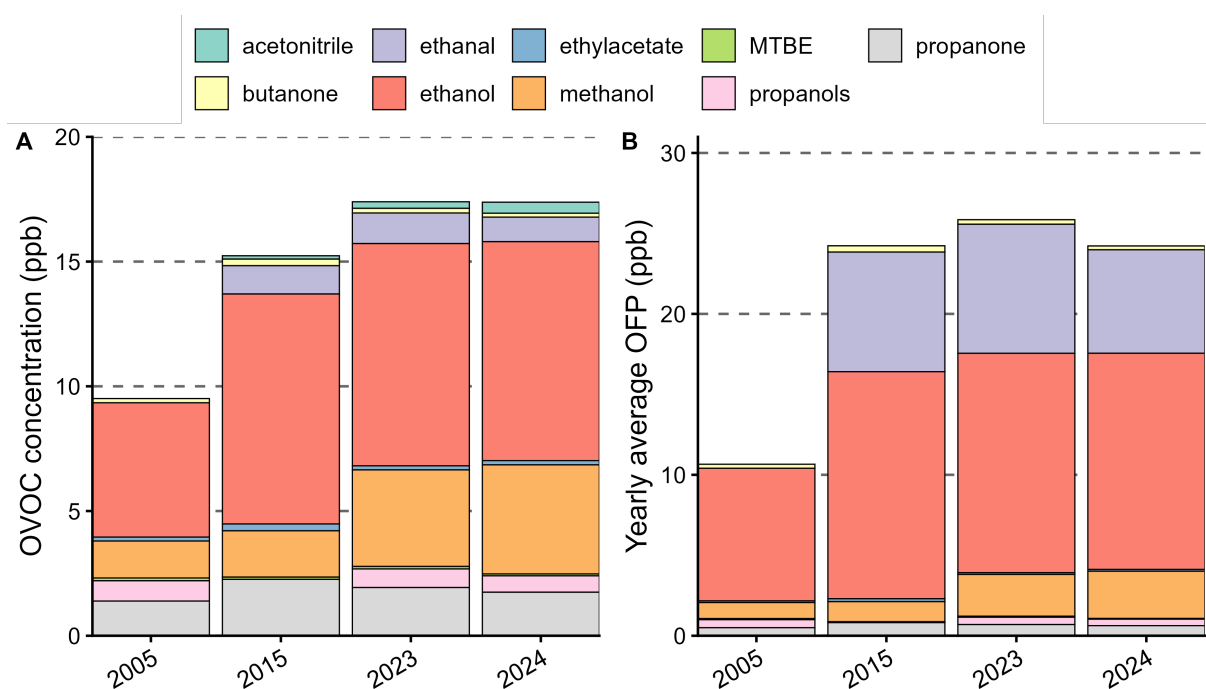

**Figure S14.** Yearly average of OVOC (A) and OFP (B) concentrations for the OVOCs monitored at the urban background station ZUE in 2005, 2025, 2023 and 2024.
